# Supplementary material for: Phylogenetic and phylodynamic approaches to understanding the evolution of non-small cell lung cancer using single-cell sequencing
Source: Research Square preprint supplement (doi:10.21203/rs.3.rs-8017001/v1), 2025-11-21
Supplement: Supplementary file 2 [file bd8ddca52d4263474b9ea706.xlsx]

## Sheet: all_coverage_breadth_sorted
Table S1. Mean depth and breadth of coverage of whole exome sequencing data.
Patient	Sample	Sample_type	Depth(All)	Depth(covered)	Breadth	Breadth(>=5X)	Breadth(>=10X)	Retained after filtering process
16011	16011N_S10_001	Bulk	116.597	116.82	99.809	99.6896	99.659	Yes
16011	16011P1A01_S7_001	Single-cell	103.889	153.81	67.5425	49.9844	41.4877	Yes
16011	16011P1A02_S8_001	Single-cell	94.0629	115.345	81.5477	65.7377	56.272	Yes
16011	16011P1A03_S42_001	Single-cell	67.3228	108.42	62.0924	42.9373	34.3255	Yes
16011	16011P1B01_S19_001	Single-cell	125.679	505.325	24.87	16.5745	13.6145	No
16011	16011P1B02_S20_001	Single-cell	90.256	116.301	77.6037	60.9046	51.4085	Yes
16011	16011P1B03_S54_001	Single-cell	129.119	190.876	67.644	50.3589	42.0418	Yes
16011	16011P1C01_S31_001	Single-cell	92.0263	121.069	76.0094	58.432	49.0698	Yes
16011	16011P1C02_S32_001	Single-cell	88.0877	114.965	76.6195	59.8145	50.5673	Yes
16011	16011P1D01_S43_001	Single-cell	120.463	148.357	81.1962	66.2564	57.3848	Yes
16011	16011P1D02_S44_001	Single-cell	104.686	111.6	93.8025	83.6667	75.1972	Yes
16011	16011P1E01_S55_001	Single-cell	76.5471	160.25	47.7658	32.0979	25.8268	Yes
16011	16011P1E02_S56_001	Single-cell	68.1758	105.059	64.8907	46.9273	38.3395	Yes
16011	16011P1F01_S67_001	Single-cell	107.872	140.745	76.6416	60.4786	51.5195	Yes
16011	16011P1F02_S68_001	Single-cell	81.9923	102.989	79.6114	62.6535	52.8192	Yes
16011	16011P1G01_S79_001	Single-cell	144.417	206.76	69.8459	53.7007	45.5188	Yes
16011	16011P1G02_S80_001	Single-cell	111.937	129.922	86.1558	72.0078	62.6708	Yes
16011	16011P1H01_S91_001	Single-cell	109.508	271.737	40.298	27.7539	22.7803	Yes
16011	16011P1H02_S92_001	Single-cell	123.881	153.607	80.646	65.3196	56.2363	Yes
17004	17004N_S46_001	Bulk	273.332	273.739	99.851	99.7339	99.7044	Yes
17004	17004p1A01_S1_001	Single-cell	140.199	249.075	56.2865	44.6402	38.8557	Yes
17004	17004p1A02_S2_001	Single-cell	106.034	346.497	30.6005	22.4372	18.9083	Yes
17004	17004p1A03_S3_001	Single-cell	189.253	250.632	75.5086	62.6323	55.2974	Yes
17004	17004p1A04_S4_001	Single-cell	177.085	258.701	68.4501	56.228	49.5956	Yes
17004	17004p1A05_S5_001	Single-cell	138.89	171.206	81.1225	68.7788	60.9606	Yes
17004	17004p1A06_S6_001	Single-cell	88.3239	155.107	56.9424	42.7113	35.8364	Yes
17004	17004p1B01_S13_001	Single-cell	145.103	232.071	62.5239	49.5677	43.0464	Yes
17004	17004p1B02_S14_001	Single-cell	124.05	215.036	57.6866	43.3383	36.578	Yes
17004	17004p1B03_S15_001	Single-cell	105.252	144.388	72.8935	55.6583	46.8089	Yes
17004	17004p1B04_S16_001	Single-cell	151.498	230.303	65.78	52.7106	46.0146	Yes
17004	17004p1B05_S17_001	Single-cell	128.472	217.314	59.1163	45.7081	39.1947	Yes
17004	17004p1B06_S18_001	Single-cell	128.634	210.554	61.0911	46.9473	40.1595	Yes
17004	17004p1C01_S25_001	Single-cell	139.454	182.164	76.553	62.1998	54.2434	Yes
17004	17004p1C02_S26_001	Single-cell	127.075	184.03	69.049	53.4813	45.703	Yes
17004	17004p1C03_S27_001	Single-cell	134.434	262.942	51.1255	38.6952	33.0354	Yes
17004	17004p1C04_S28_001	Single-cell	3.11719	12.9283	24.1106	10.9441	6.83874	No
17004	17004p1C04_S7_001	Single-cell	117.158	168.591	69.4913	39.4216	32.5069	Yes
17004	17004p1C05_S29_001	Single-cell	137.735	204.105	67.4805	53.5238	46.3668	Yes
17004	17004p1C06_S30_001	Single-cell	51.6025	226.69	22.7626	15.4334	12.6915	No
17004	17004p1D01_S37_001	Single-cell	141.758	225.87	62.7593	48.9664	42.3853	Yes
17004	17004p1D02_S38_001	Single-cell	88.0085	157.823	55.7624	41.7769	35.1946	Yes
17004	17004p1D03_S39_001	Single-cell	92.6902	102.739	90.2174	77.1773	67.4083	Yes
17004	17004p1D04_S40_001	Single-cell	118.496	178.908	66.2314	50.2614	42.3389	Yes
17004	17004p1D05_S41_001	Single-cell	100.421	149.116	67.3421	52.5558	44.8942	Yes
17004	17004p1E01_S49_001	Single-cell	172.831	303.64	56.918	44.005	37.9837	Yes
17004	17004p1E02_S50_001	Single-cell	214.365	341.087	62.846	50.854	44.7119	Yes
17004	17004p1E03_S51_001	Single-cell	127.313	205.738	61.8791	48.2431	41.43	Yes
17004	17004p1E04_S52_001	Single-cell	173.786	270.209	64.3137	50.123	43.1613	Yes
17004	17004p1E05_S53_001	Single-cell	146.765	220.106	66.6769	52.5479	45.2514	Yes
17004	17004p1F01_S61_001	Single-cell	151.278	260.009	58.1801	43.8808	37.2637	Yes
17004	17004p1F02_S62_001	Single-cell	132.988	199.943	66.5117	53.2845	46.2731	Yes
17004	17004p1F03_S63_001	Single-cell	184.8	308.221	59.9555	47.2031	41.0132	Yes
17004	17004p1F04_S64_001	Single-cell	171.616	220.772	77.7332	64.5242	56.8815	Yes
17004	17004p1F05_S65_001	Single-cell	151.941	239.342	63.4812	50.1565	43.3533	Yes
17004	17004p1G01_S73_001	Single-cell	201.315	279.529	72.0175	60.0062	53.3423	Yes
17004	17004p1G02_S74_001	Single-cell	171.102	242.63	70.5184	57.6874	50.5872	Yes
17004	17004p1G03_S75_001	Single-cell	104.479	174.926	59.7266	46.2937	39.4466	Yes
17004	17004p1G04_S76_001	Single-cell	100.588	213.59	47.0923	34.7254	29.1606	Yes
17004	17004p1G05_S77_001	Single-cell	184.495	200.937	91.8158	81.7898	74.3536	Yes
17004	17004p1H01_S85_001	Single-cell	144.914	340.191	42.5963	31.2089	26.2749	Yes
17004	17004p1H02_S86_001	Single-cell	184.61	510.994	36.1266	26.4211	22.4937	Yes
17004	17004p1H03_S87_001	Single-cell	232.146	398.797	58.2104	44.8733	38.6849	Yes
17004	17004p1H04_S88_001	Single-cell	179.283	367.322	48.8073	37.2065	31.9426	Yes
17004	17004p1H05_S89_001	Single-cell	87.0674	246.987	35.2506	25.2266	21.0363	Yes
17004	17004p2A01_S1_001	Single-cell	101.423	219.328	46.2413	33.4068	27.7255	Yes
17004	17004p2A02_S2_001	Single-cell	111.672	204.008	54.7373	39.8058	33.1141	Yes
17004	17004p2A03_S3_001	Single-cell	165.317	382.449	43.2248	31.1778	26.1559	Yes
17004	17004p2A04_S4_001	Single-cell	142.476	304.342	46.8131	33.9848	28.3844	Yes
17004	17004p2B01_S13_001	Single-cell	83.505	148.71	56.1511	40.897	33.9364	Yes
17004	17004p2B02_S14_001	Single-cell	100.3	247.946	40.4509	29.7357	25.1553	Yes
17004	17004p2B03_S15_001	Single-cell	111.896	210.392	53.1828	38.7936	32.578	Yes
17004	17004p2B04_S16_001	Single-cell	77.7721	213.413	36.441	25.2304	20.7528	Yes
17004	17004p2C01_S25_001	Single-cell	116.495	226.69	51.3883	38.0938	32.1251	Yes
17004	17004p2C02_S26_001	Single-cell	129.492	225.101	57.5248	44.0925	37.7056	Yes
17004	17004p2C03_S27_001	Single-cell	81.4846	342.507	23.7896	15.8287	12.9227	No
17004	17004p2C04_S28_001	Single-cell	96.5759	124.625	77.4916	62.0353	53.2543	Yes
17004	17004p2D01_S37_001	Single-cell	100.423	304.376	32.992	22.9461	19.12	Yes
17004	17004p2D02_S38_001	Single-cell	128.833	424.76	30.3297	20.5907	17.0357	Yes
17004	17004p2D03_S39_001	Single-cell	111.949	238.717	46.8949	34.279	28.7379	Yes
17004	17004p2E01_S49_001	Single-cell	92.3091	316.765	29.1397	19.7779	16.3005	Yes
17004	17004p2E02_S50_001	Single-cell	92.9745	129.734	71.6641	54.3532	45.3685	Yes
17004	17004p2E03_S51_001	Single-cell	117.721	496.425	23.7132	16.4775	13.7754	No
17004	17004p2F01_S61_001	Single-cell	94.1714	245.411	38.3716	26.7631	22.1502	Yes
17004	17004p2F02_S62_001	Single-cell	108.837	337.59	32.2383	22.5411	18.8154	Yes
17004	17004p2F03_S63_001	Single-cell	114.153	200.287	56.993	42.6006	36.0448	Yes
17004	17004p2G01_S73_001	Single-cell	106.403	270.279	39.3666	27.0053	22.2501	Yes
17004	17004p2G02_S74_001	Single-cell	145.293	297.904	48.7699	35.3606	29.5262	Yes
17004	17004p2G03_S75_001	Single-cell	60.1408	256.114	23.4812	14.4572	11.3378	No
17004	17004p2H01_S85_001	Single-cell	129.019	378.353	34.099	24.5303	20.5866	Yes
17004	17004p2H02_S86_001	Single-cell	108.839	199.272	54.6169	40.4344	33.8484	Yes
17004	17004p2H03_S87_001	Single-cell	72.7107	200.048	36.3455	25.196	20.5268	Yes
17005	17005N_S58_001	Bulk	328.783	329.087	99.9073	99.8787	99.869	Yes
17005	17005p1A01_S10_001	Single-cell	48.8254	155.322	31.4338	21.374	17.4008	Yes
17005	17005p1A02_S11_001	Single-cell	103.756	163.74	63.365	47.7701	40.4074	Yes
17005	17005p1B01_S22_001	Single-cell	95.7347	139.25	68.7485	54.2225	46.4851	Yes
17005	17005p1B02_S23_001	Single-cell	87.0579	156.844	55.5043	40.6226	33.8677	Yes
17005	17005p1C01_S34_001	Single-cell	79.1079	130.77	60.493	45.4451	38.2045	Yes
17005	17005p1C02_S35_001	Single-cell	63.7166	188.288	33.8388	22.6103	18.3432	Yes
17005	17005p1D01_S46_001	Single-cell	84.5791	263.33	32.1181	23.2707	19.7054	Yes
17005	17005p1D02_S47_001	Single-cell	60.5049	168.33	35.9431	24.4705	20.0939	Yes
17005	17005p1E01_S58_001	Single-cell	55.8043	101.664	54.8897	39.2504	32.3015	Yes
17005	17005p1E02_S59_001	Single-cell	87.2371	210.048	41.5309	29.3549	24.4149	Yes
17005	17005p1F01_S70_001	Single-cell	90.3674	117.761	76.7364	62.2784	53.9733	Yes
17005	17005p1F02_S71_001	Single-cell	74.3691	112.698	65.9882	50.7373	43.04	Yes
17005	17005p1G01_S82_001	Single-cell	65.5129	225.368	29.0684	19.7682	16.2891	Yes
17005	17005p1H01_S94_001	Single-cell	98.9649	233.844	42.3202	30.1499	25.1441	Yes
17005	17005P2A01_S3_001	Single-cell	85.9802	112.029	76.7466	50.5266	40.9703	Yes
17005	17005P2A02_S4_001	Single-cell	80.7238	111.375	72.4773	45.8691	37.0838	Yes
17005	17005P2B01_S15_001	Single-cell	105.192	150.434	69.9239	42.5268	34.1538	Yes
17005	17005P2B02_S16_001	Single-cell	155.696	267.093	58.2911	27.5408	20.3855	Yes
17005	17005P2C01_S27_001	Single-cell	3.38599	7.68405	44.0632	10.4347	4.22703	No
17005	17005P2C02_S28_001	Single-cell	149.378	212.064	70.4384	47.5651	39.109	Yes
17005	17005P2D01_S39_001	Single-cell	162.597	197.647	82.2647	63.8851	55.5471	Yes
17005	17005P2D02_S40_001	Single-cell	142.699	189.735	75.2082	51.3911	42.6429	Yes
17005	17005P2E01_S51_001	Single-cell	107.361	165.758	64.7673	29.1028	21.5757	Yes
17005	17005P2E02_S52_001	Single-cell	83.5244	107.023	78.0416	51.4987	41.5395	Yes
17005	17005P2F01_S63_001	Single-cell	91.7044	158.692	57.7862	29.0227	22.6675	Yes
17005	17005P2G01_S75_001	Single-cell	89.4737	121.49	73.6453	48.4078	39.1364	Yes
17005	17005P2H01_S86_001	Single-cell	101.313	135.747	74.632	49.4593	40.1358	Yes
17008	17008N_S70_001	Bulk	133.192	133.443	99.8118	99.7027	99.6679	Yes
17008	17008p1A01_S8_001	Single-cell	81.8828	181.381	45.1426	31.2732	25.4268	Yes
17008	17008p1A02_S9_001	Single-cell	80.1786	176.466	45.4339	31.3044	25.4332	Yes
17008	17008p1B01_S20_001	Single-cell	90.4293	159.236	56.7879	40.9713	33.9765	Yes
17008	17008p1B02_S21_001	Single-cell	90.8707	170.835	53.1907	38.4579	31.8956	Yes
17008	17008p1C01_S32_001	Single-cell	94.0274	140.755	66.8005	49.6786	41.3442	Yes
17008	17008p1C02_S33_001	Single-cell	61.7791	106.069	58.2427	40.5641	32.833	Yes
17008	17008p1D01_S44_001	Single-cell	99.7535	191.091	52.2009	37.4639	31.1046	Yes
17008	17008p1D02_S45_001	Single-cell	91.5994	259.491	35.2985	23.6667	19.3568	Yes
17008	17008p1E01_S56_001	Single-cell	91.2344	131.111	69.5837	52.8119	44.283	Yes
17008	17008p1F01_S68_001	Single-cell	100.451	187.406	53.5997	38.1645	31.6293	Yes
17008	17008p1G01_S80_001	Single-cell	125.199	256.291	48.8492	35.0688	29.3773	Yes
17008	17008p1H01_S92_001	Single-cell	94.5044	118.72	79.601	63.5892	54.2658	Yes
17008	17008p2A01_S10_001	Single-cell	46.1643	178.779	25.8213	15.6058	12.0758	No
17008	17008p2A02_S69_001	Single-cell	109.984	172.48	63.7645	48.5744	41.1627	Yes
17008	17008p2B01_S22_001	Single-cell	99.6735	162.448	61.3556	46.6582	39.452	Yes
17008	17008p2B02_S81_001	Single-cell	105.112	140.19	74.9767	59.0604	50.4666	Yes
17008	17008p2C01_S34_001	Single-cell	62.9955	215.016	29.2969	19.2338	15.6193	Yes
17008	17008p2C02_S93_001	Single-cell	91.0712	130.402	69.8374	53.72	45.3967	Yes
17008	17008p2D01_S46_001	Single-cell	138.045	171.386	80.5445	66.6887	58.5579	Yes
17008	17008p2E01_S58_001	Single-cell	87.4092	133.681	65.3843	49.59	41.7678	Yes
17008	17008p2F01_S70_001	Single-cell	116.127	175.396	66.2068	51.0499	43.6676	Yes
17008	17008p2G01_S82_001	Single-cell	75.2763	99.3136	75.7952	59.0152	49.7438	Yes
17008	17008p2H01_S94_001	Single-cell	81.2911	109.164	74.465	58.3988	49.6037	Yes
17011	17011N_S81_001	Bulk	147.505	147.642	99.9073	99.8686	99.8463	Yes
17011	17011P1A01_S5_001	Single-cell	43.3692	70.2287	61.752	37.4633	29.5401	Yes
17011	17011P1A02_S64_001	Single-cell	74.1903	113.054	65.6222	37.1348	28.2867	Yes
17011	17011P1B01_S17_001	Single-cell	19.7771	61.0283	32.4049	5.03753	2.56486	No
17011	17011P1C01_S29_001	Single-cell	62.7202	84.6811	74.0647	53.3638	43.7548	Yes
17011	17011P1D01_S41_001	Single-cell	69.0118	87.0636	79.2643	57.9993	47.6639	Yes
17011	17011P1E01_S53_001	Single-cell	44.4856	57.649	77.1638	51.3338	40.6184	Yes
17011	17011P1F01_S65_001	Single-cell	34.2134	54.7628	62.4736	33.9531	25.3518	Yes
17011	17011P1G01_S77_001	Single-cell	35.6111	64.8989	54.8697	29.6187	22.9478	Yes
17011	17011P1H01_S88_001	Single-cell	29.713	53.3038	55.7407	27.7389	20.2292	Yes
17011	17011p2A01_S7_001	Single-cell	34.0934	18824.8	0.181108	0.143593	0.139238	No
17011	17011p2A02_S78_001	Single-cell	41.1919	814.744	5.05559	2.93631	2.31564	No
17011	17011p2B01_S19_001	Single-cell	62.0868	281.072	22.0884	13.6145	10.7078	No
17011	17011p2B02_S90_001	Single-cell	83.3396	199.542	41.7638	29.0942	23.831	Yes
17011	17011p2C01_S31_001	Single-cell	93.6227	285.361	32.8074	22.091	18.0735	Yes
17011	17011p2C02_S57_001	Single-cell	95.7159	301.341	31.7623	20.9131	17.0366	Yes
17011	17011p2D01_S43_001	Single-cell	65.5731	328.015	19.99	12.1268	9.51561	No
17011	17011p2E01_S55_001	Single-cell	95.6751	112.1	85.346	70.7699	61.3183	Yes
17011	17011p2F01_S67_001	Single-cell	61.924	131.837	46.9687	31.6393	25.5648	Yes
17011	17011p2G01_S79_001	Single-cell	113.852	195.892	58.1182	43.1926	36.3419	Yes
17011	17011p2H01_S91_001	Single-cell	54.8165	423.461	12.9443	7.48691	5.82592	No
17012	17012N_S93_001	Bulk	162.432	162.589	99.9032	99.8708	99.8498	Yes
17012	17012p1A01_S2_001	Single-cell	138.334	193.762	71.3914	27.1426	19.0285	Yes
17012	17012p1A02_S25_001	Single-cell	126.972	194.206	65.378	28.1175	20.1086	Yes
17012	17012p1B01_S14_001	Single-cell	76.734	109.737	69.9229	26.2617	16.8131	Yes
17012	17012p1B02_S37_001	Single-cell	105.395	173.062	60.8978	24.4828	17.4385	Yes
17012	17012p1C01_S26_001	Single-cell	154.722	201.977	76.6021	43.5569	34.2958	Yes
17012	17012p1C02_S49_001	Single-cell	135.354	187.316	72.2575	36.6862	28.4591	Yes
17012	17012p1D01_S38_001	Single-cell	156.832	194.983	80.4316	38.2626	27.3067	Yes
17012	17012p1D02_S61_001	Single-cell	119.219	173.681	68.6406	38.2549	30.4229	Yes
17012	17012p1E01_S50_001	Single-cell	83.5157	104.182	80.1608	28.0951	15.7024	Yes
17012	17012p1E02_S73_001	Single-cell	77.4144	96.1675	80.4971	42.7258	30.1924	Yes
17012	17012p1F01_S62_001	Single-cell	90.9963	104.253	87.2825	62.4372	50.753	Yes
17012	17012p1F02_S84_001	Single-cell	119.854	126.284	94.9064	76.5129	57.7553	Yes
17012	17012p1G01_S74_001	Single-cell	119.05	176.165	67.577	26.7796	19.5856	Yes
17012	17012p1H01_S85_001	Single-cell	97.8848	134.701	72.6659	34.1925	25.5386	Yes
17012	17012P2A01_S6_001	Single-cell	67.4015	90.3931	74.5624	36.3524	25.9862	Yes
17012	17012P2A02_S76_001	Single-cell	103.595	146.317	70.8	44.9263	35.8971	Yes
17012	17012P2B01_S18_001	Single-cell	219.613	314.572	69.8114	40.6576	32.6503	Yes
17012	17012P2C01_S30_001	Single-cell	135.531	251.985	53.7833	25.7046	19.0171	Yes
17012	17012P2D01_S42_001	Single-cell	270.786	396.727	68.2531	36.9714	28.8206	Yes
17012	17012P2E01_S54_001	Single-cell	74.3788	111.83	66.508	26.4788	17.2394	Yes
17012	17012P2F01_S66_001	Single-cell	123.034	198.523	61.9729	33.1838	25.428	Yes
17012	17012P2G01_S78_001	Single-cell	137.173	234.17	58.5765	26.9507	19.9101	Yes
17012	17012P2H01_S89_001	Single-cell	66.9895	101.693	65.8721	32.8757	23.4597	Yes
17017	17017N_S23_001	Bulk	205.694	206.109	99.7983	99.7084	99.6893	Yes
17017	17017P1A01_S19_001	Single-cell	1.48469	2.96059	50.1456	7.25938	2.13258	No
17017	17017p1A01_S72_001	Single-cell	0.000644587	2.84977	0.0226164	0.00258781	0.0010804	No
17017	17017p1B01_S84_001	Single-cell	4.46059	168.881	2.64121	1.43113	1.09586	No
17017	17017P1B02_S31_001	Single-cell	14.4087	30.5809	47.1148	13.3095	6.55764	No
17017	17017P1C01_S43_001	Single-cell	1.50701	3.07526	49.0023	7.75235	2.11211	No
17017	17017p1C01_S96_001	Single-cell	8.44255e-05	1.30966	0.00644638	0	0	No
17017	17017P2A01_S9_001	Single-cell	161.249	297.75	54.1546	40.7766	34.7298	Yes
17017	17017P2A02_S10_001	Single-cell	48.7196	416.026	11.7104	7.05581	5.56011	No
17017	17017P2A03_S11_001	Single-cell	100.135	216.967	46.1509	33.5569	28.1262	Yes
17017	17017P2A04_S12_001	Single-cell	69.4874	212.433	32.7093	20.8328	16.4606	Yes
17017	17017P2A05_S78_001	Single-cell	139.845	234.202	59.7101	46.7292	40.1604	Yes
17017	17017P2B01_S21_001	Single-cell	68.4134	346.857	19.723	12.3771	9.80894	Yes
17017	17017P2B02_S22_001	Single-cell	42.3594	82.9495	51.0648	35.0778	27.8644	Yes
17017	17017P2B02_S55_001	Single-cell	205.653	260.436	78.9635	53.5084	44.8229	Yes
17017	17017P2B03_S23_001	Single-cell	155.953	230.095	67.7764	53.9915	46.8401	Yes
17017	17017P2B04_S24_001	Single-cell	70.1197	131.118	53.4766	38.2705	31.443	Yes
17017	17017P2C01_S33_001	Single-cell	128.653	276.549	46.52	34.4228	29.1038	Yes
17017	17017P2C02_S34_001	Single-cell	119.032	182.678	65.1578	49.5075	41.8486	Yes
17017	17017P2C03_S35_001	Single-cell	32.3334	79.3456	40.7488	26.5865	20.8279	Yes
17017	17017P2C03_S67_001	Single-cell	81.2101	125.054	64.9382	37.2775	29.3577	Yes
17017	17017P2C04_S36_001	Single-cell	34.4482	68.1126	50.5738	32.8776	25.4565	Yes
17017	17017P2C04_S90_001	Single-cell	158.097	201.489	78.4624	55.2938	45.666	Yes
17017	17017P2D01_S45_001	Single-cell	84.5815	165.823	51.0054	36.6557	30.2398	Yes
17017	17017P2D02_S46_001	Single-cell	58.091	196.608	29.5454	18.4743	14.6155	Yes
17017	17017P2D03_S47_001	Single-cell	88.9565	141.791	62.7359	44.8136	36.9357	Yes
17017	17017P2D04_S48_001	Single-cell	76.168	172.619	44.1243	32.0019	26.8252	Yes
17017	17017P2E01_S57_001	Single-cell	53.8909	236.777	22.7594	13.7443	10.6873	Yes
17017	17017P2E02_S58_001	Single-cell	79.1595	172.707	45.8329	32.0259	26.3247	Yes
17017	17017P2E03_S59_001	Single-cell	91.8911	150.756	60.9521	45.2359	37.7468	Yes
17017	17017P2E04_S60_001	Single-cell	38.1479	87.5861	43.5533	28.4015	22.3551	Yes
17017	17017P2E04_S8_001	Single-cell	52.2858	84.7191	61.7147	33.2159	25.7682	Yes
17017	17017P2F01_S69_001	Single-cell	118.034	299.682	39.3851	28.2357	23.5587	Yes
17017	17017P2F02_S70_001	Single-cell	94.51	167.779	56.3285	41.7449	34.9953	Yes
17017	17017P2F03_S71_001	Single-cell	38.176	101.541	37.5957	24.8071	19.7314	Yes
17017	17017P2F03_S79_001	Single-cell	123.618	160.823	76.8639	52.56	43.0639	Yes
17017	17017P2F04_S20_001	Single-cell	36.0633	97.2435	37.0839	9.04445	5.65684	No
17017	17017P2F04_S72_001	Single-cell	19.249	294.402	6.53811	3.94995	3.12663	No
17017	17017P2G01_S81_001	Single-cell	79.0793	239.387	33.0328	22.7858	18.7626	Yes
17017	17017P2G02_S82_001	Single-cell	106.716	214.38	49.7774	35.8134	29.708	Yes
17017	17017P2G03_S83_001	Single-cell	84.8935	178.279	47.6171	32.9087	26.6803	Yes
17017	17017P2G04_S84_001	Single-cell	41.2763	170.719	24.1769	14.5552	11.2955	Yes
17017	17017P2G05_S32_001	Single-cell	66.8654	152.305	43.9009	19.1642	14.1177	Yes
17017	17017P2H01_S93_001	Single-cell	64.283	137.817	46.642	31.8565	25.788	Yes
17017	17017P2H02_S94_001	Single-cell	84.3372	324.997	25.9491	16.3133	12.9109	Yes
17017	17017P2H03_S95_001	Single-cell	51.4087	115.42	44.5393	30.3285	24.4248	Yes
17017	17017P2H04_S66_001	Single-cell	100.35	151.312	66.3183	50.633	42.5102	Yes
17028	17028N_S80_001	Bulk	163.814	164.119	99.8142	99.7053	99.6734	Yes
17028	17028p1A01_S1_001	Single-cell	103.492	526.018	19.6738	13.0715	10.6146	No
17028	17028p1A02_S2_001	Single-cell	103.233	198.71	51.9502	38.1178	31.9363	Yes
17028	17028p1A03_S3_001	Single-cell	140.089	167.868	83.4505	69.5004	61.1216	Yes
17028	17028p1A04_S4_001	Single-cell	148.937	264.772	56.2494	42.8554	36.5266	Yes
17028	17028p1B01_S13_001	Single-cell	105.735	270.728	39.0548	27.4007	22.7144	Yes
17028	17028p1B02_S14_001	Single-cell	104.751	181.022	57.865	41.4346	33.9605	Yes
17028	17028p1B03_S15_001	Single-cell	116.114	155.429	74.7036	59.203	50.6518	Yes
17028	17028p1C01_S25_001	Single-cell	92.3322	253.325	36.4471	24.9002	20.4827	Yes
17028	17028p1C02_S26_001	Single-cell	99.7327	144.054	69.2308	52.7465	44.221	Yes
17028	17028p1C03_S27_001	Single-cell	50.5592	199.524	25.3391	15.3039	11.8603	No
17028	17028p1D01_S37_001	Single-cell	100.052	164.505	60.8183	45.2507	37.8909	Yes
17028	17028p1D02_S38_001	Single-cell	82.8071	392.271	21.109	14.0736	11.5978	No
17028	17028p1D03_S39_001	Single-cell	67.4924	310.046	21.7676	14.4281	11.7277	No
17028	17028p1E01_S49_001	Single-cell	138.083	333.902	41.3529	30.5753	25.8901	Yes
17028	17028p1E02_S50_001	Single-cell	118.029	162.008	72.8516	56.539	47.8608	Yes
17028	17028p1E03_S51_001	Single-cell	100.064	201.39	49.6857	35.553	29.4616	Yes
17028	17028p1F01_S61_001	Single-cell	76.3368	234.939	32.4911	21.485	17.2901	Yes
17028	17028p1F02_S62_001	Single-cell	103.531	251.586	41.1501	29.7216	24.9354	Yes
17028	17028p1F03_S63_001	Single-cell	101.552	180.557	56.2422	40.0409	32.8831	Yes
17028	17028p1G01_S73_001	Single-cell	135.161	180.007	75.0847	59.9988	51.8383	Yes
17028	17028p1G02_S74_001	Single-cell	109.446	147.803	74.0468	56.98	48.0105	Yes
17028	17028p1G03_S75_001	Single-cell	67.8324	129.436	52.4048	36.4618	29.5246	Yes
17028	17028p1H01_S85_001	Single-cell	72.7886	176.52	41.2342	27.5044	22.0827	Yes
17028	17028p1H02_S86_001	Single-cell	91.239	104.586	87.2362	71.8584	61.5252	Yes
17028	17028p1H03_S87_001	Single-cell	91.6404	160.895	56.9551	41.6042	34.5352	Yes
17028	17028P4A01_S12_001	Single-cell	148.135	287.518	51.5207	38.422	32.7774	Yes
17028	17028P4B01_S24_001	Single-cell	88.5455	406.073	21.8042	14.4535	11.8989	No
17028	17028P4C01_S36_001	Single-cell	101.938	234.359	43.4953	30.5862	25.1841	Yes
17028	17028P4D01_S48_001	Single-cell	128.586	177.969	72.2503	55.1108	46.6232	Yes
17028	17028P4E01_S60_001	Single-cell	80.5798	127.091	63.4016	44.9324	36.6815	Yes
17028	17028P4F01_S72_001	Single-cell	97.665	231.742	42.1426	29.6498	24.6407	Yes
17028	17028P4G01_S84_001	Single-cell	150.027	568.339	26.3966	18.2962	15.3297	Yes
17028	17028p6A01_S7_001	Single-cell	66.2428	122.334	54.147	37.5238	30.4211	Yes
17028	17028p6A02_S8_001	Single-cell	138.35	284.57	48.6158	36.5128	31.2453	Yes
17028	17028p6A03_S9_001	Single-cell	43.3203	288.154	15.0327	8.86897	6.90771	No
17028	17028p6A04_S83_001	Single-cell	153.408	517.429	29.6474	21.6497	18.5304	Yes
17028	17028p6B01_S19_001	Single-cell	103.021	379.814	27.1233	18.6419	15.443	Yes
17028	17028p6B02_S20_001	Single-cell	144.072	291.147	49.4825	37.5223	32.1942	Yes
17028	17028p6B03_S21_001	Single-cell	161.462	232.972	69.3034	54.7449	47.1695	Yes
17028	17028p6B04_S95_001	Single-cell	128.498	307.685	41.7617	30.7635	26.0174	Yes
17028	17028p6C01_S31_001	Single-cell	102.637	199.524	51.4391	37.6301	31.5078	Yes
17028	17028p6C02_S32_001	Single-cell	218.891	316.481	69.1624	55.0473	47.9853	Yes
17028	17028p6C03_S33_001	Single-cell	111.912	197.517	56.6579	43.2209	36.8013	Yes
17028	17028p6C04_S96_001	Single-cell	71.8192	91.5794	78.4214	59.6304	49.2508	Yes
17028	17028p6D01_S43_001	Single-cell	132.095	213.431	61.8896	46.0251	38.8168	Yes
17028	17028p6D02_S44_001	Single-cell	102.475	138.417	74.032	56.8501	47.8396	Yes
17028	17028p6D03_S45_001	Single-cell	85.645	142.823	59.9642	43.8235	36.3234	Yes
17028	17028p6E01_S55_001	Single-cell	87.6935	128.558	68.2112	50.9264	42.4357	Yes
17028	17028p6E02_S56_001	Single-cell	88.7317	137.877	64.3545	47.7906	39.7511	Yes
17028	17028p6E03_S57_001	Single-cell	108.931	149.846	72.6939	57.255	48.8331	Yes
17028	17028p6F01_S67_001	Single-cell	73.0026	158.991	45.9149	31.681	25.8546	Yes
17028	17028p6F02_S68_001	Single-cell	145.52	276.29	52.6682	39.8126	33.9414	Yes
17028	17028p6F03_S69_001	Single-cell	63.3035	268.027	23.6174	14.7512	11.7294	No
17028	17028p6G01_S79_001	Single-cell	86.9754	455.115	19.1099	12.7897	10.5112	No
17028	17028p6G02_S80_001	Single-cell	71.6365	319.687	22.4077	14.8056	12.0224	No
17028	17028p6G03_S81_001	Single-cell	69.1426	186.281	37.116	25.2395	20.5952	Yes
17028	17028p6H01_S91_001	Single-cell	154.979	233.459	66.3824	51.8523	44.57	Yes
17028	17028p6H02_S92_001	Single-cell	60.7835	188.081	32.3163	21.1614	16.9803	Yes
17028	17028p6H03_S93_001	Single-cell	86.8912	157.69	55.1008	38.6825	31.6957	Yes
17029	17029N_S57_001	Bulk	323.671	323.967	99.9084	99.8811	99.8728	Yes
17029	17029p1A01_S5_001	Single-cell	189.887	767.273	24.7475	17.2429	14.551	Yes
17029	17029p1A02_S6_001	Single-cell	115.943	189.857	61.0669	46.449	39.3583	Yes
17029	17029p1A03_S16_001	Single-cell	159.025	417.817	38.0599	28.1637	24.1174	Yes
17029	17029p1B01_S17_001	Single-cell	126.382	244.237	51.7441	38.9655	33.2251	Yes
17029	17029p1B02_S18_001	Single-cell	171.746	216.356	79.3789	67.2511	59.8384	Yes
17029	17029p1B03_S28_001	Single-cell	127.299	215.352	59.1103	44.4668	37.6074	Yes
17029	17029p1C01_S29_001	Single-cell	133.429	174.309	76.5462	60.1595	51.4954	Yes
17029	17029p1C02_S30_001	Single-cell	112.066	312.194	35.8952	25.8713	21.8789	Yes
17029	17029p1C03_S40_001	Single-cell	119.876	273.558	43.8194	31.5757	26.4143	Yes
17029	17029p1D01_S41_001	Single-cell	167.881	276.2	60.7809	47.1205	40.8448	Yes
17029	17029p1D02_S42_001	Single-cell	185.865	582.443	31.9105	23.0288	19.7412	Yes
17029	17029p1D03_S52_001	Single-cell	150.641	182.133	82.7078	69.5296	61.4233	Yes
17029	17029p1E01_S53_001	Single-cell	134.947	156.959	85.9746	74.4099	66.5628	Yes
17029	17029p1E02_S54_001	Single-cell	133.851	298.943	44.7736	33.497	28.704	Yes
17029	17029p1E03_S64_001	Single-cell	89.8984	312.349	28.7803	19.1354	15.5989	Yes
17029	17029p1F01_S65_001	Single-cell	118.749	302.175	39.2971	28.8444	24.5072	Yes
17029	17029p1F02_S66_001	Single-cell	119.877	227.577	52.6739	40.3494	34.6199	Yes
17029	17029p1F03_S76_001	Single-cell	104.165	138.071	75.4413	59.2134	50.509	Yes
17029	17029p1G01_S77_001	Single-cell	39.7583	634.584	6.26507	3.82668	3.08191	No
17029	17029p1G02_S78_001	Single-cell	124.901	275.012	45.4155	33.4404	28.3924	Yes
17029	17029p1G03_S88_001	Single-cell	153.463	221.475	69.2899	56.6369	49.9	Yes
17029	17029p1H01_S89_001	Single-cell	106.35	281.322	37.8024	26.5002	22.0901	Yes
17029	17029p1H02_S90_001	Single-cell	107.491	164.989	65.149	50.3734	43.024	Yes
17029	17029P2A01_S44_001	Single-cell	1.58253	3.71208	42.6299	6.43888	1.88227	No
17029	17029p2A01_S5_001	Single-cell	0.24062	1326.24	0.018143	0.00626375	0.00495698	No
17029	17029p2A02_S6_001	Single-cell	82.7382	168.901	48.9848	35.3613	29.3766	Yes
17029	17029p2B01_S17_001	Single-cell	107.819	376.049	28.6706	19.8189	16.5502	Yes
17029	17029p2B02_S18_001	Single-cell	101.727	164.689	61.7671	46.3242	39.0481	Yes
17029	17029p2C01_S29_001	Single-cell	138.578	231.435	59.8762	45.9851	39.4298	Yes
17029	17029p2C02_S30_001	Single-cell	11.4709	2909.38	0.394161	0.234635	0.195972	No
17029	17029p2D01_S41_001	Single-cell	13.8513	28.9185	47.8961	27.7024	19.5825	Yes
17029	17029P2D01_S56_001	Single-cell	232.618	283.601	82.0215	60.2306	52.0435	Yes
17029	17029p2D02_S42_001	Single-cell	97.9514	367.104	26.6811	18.0645	14.9365	Yes
17029	17029p2E01_S53_001	Single-cell	127.002	168.958	75.1662	61.218	53.3532	Yes
17029	17029p2E02_S54_001	Single-cell	84.1348	471.753	17.834	11.8134	9.77639	No
17029	17029p2F01_S65_001	Single-cell	130.718	215.289	60.7159	46.7788	40.2553	Yes
17029	17029p2F02_S66_001	Single-cell	0.00119927	17.6662	0.00678337	0.003092	0.00283476	No
17029	17029P2F02_S68_001	Single-cell	70.8262	122.348	57.8869	23.1361	16.2543	Yes
17029	17029p2G01_S77_001	Single-cell	111.439	149.121	74.7288	60.1372	52.1619	Yes
17029	17029p2H01_S89_001	Single-cell	75.849	194.05	39.0859	27.3278	22.4637	Yes
17029	17029P3A01_S12_001	Single-cell	51.7703	195.47	26.4839	17.0111	13.5861	Yes
17029	17029P3B01_S24_001	Single-cell	84.429	221.516	38.1131	25.1369	20.2316	Yes
17029	17029P3C01_S36_001	Single-cell	4.68497	3679.53	0.127323	0.0765206	0.0659713	No
17029	17029P3C01_S91_001	Single-cell	8.50016	22.4742	37.8199	7.30731	3.19776	No
17029	17029P3D01_S48_001	Single-cell	12.7149	55.4787	22.9177	12.1787	8.86059	No
17029	17029P3D01_S87_001	Single-cell	96.358	150.88	63.862	32.3806	23.4285	Yes
17029	17029P3E01_S60_001	Single-cell	44.0387	108.619	40.5428	26.4666	20.9471	Yes
17030	17030N_S69_001	Bulk	151.185	151.343	99.8955	99.8685	99.8515	Yes
17030	17030P3A01_S9_001	Single-cell	73.1155	90.6603	80.646	50.8262	41.019	Yes
17030	17030P3B01_S21_001	Single-cell	124.31	128.942	96.4071	81.0295	70.5744	Yes
17030	17030P3C01_S33_001	Single-cell	92.8482	106.772	86.9565	34.7012	19.5385	Yes
17030	17030P3D01_S45_001	Single-cell	201.497	215.823	93.3608	75.5784	66.4419	Yes
17030	17030p4A01_S71_001	Single-cell	69.27	317.731	21.8008	14.9326	12.4404	Yes
17030	17030p4B01_S83_001	Single-cell	89.228	196.146	45.4894	33.2185	27.926	Yes
17030	17030p4C01_S95_001	Single-cell	104.576	240.08	43.5571	31.6672	26.693	Yes
18001	18001N_S92_001	Bulk	172.825	173.102	99.8395	99.7445	99.706	Yes
18001	18001p3A01_S40_001	Single-cell	63.3269	747.221	8.47478	5.59204	4.60508	No
18001	18001p3B01_S52_001	Single-cell	155.634	550.006	28.2958	20.3837	17.345	Yes
18001	18001p3C01_S64_001	Single-cell	113.97	418.502	27.2317	19.799	16.9008	Yes
18001	18001p3D01_S76_001	Single-cell	93.882	398.864	23.5365	17.2639	14.803	Yes
18001	18001p3E01_S88_001	Single-cell	198.547	1453.67	13.6579	9.95458	8.62014	Yes
18001	18001p4A01_S11_001	Single-cell	83.1381	507.294	16.3882	11.6889	9.95573	Yes
18001	18001p4B01_S23_001	Single-cell	125.516	174.186	72.0569	55.9578	47.7024	Yes
18001	18001p4C01_S35_001	Single-cell	61.8852	295.016	20.9762	14.1682	11.6751	Yes
18001	18001p4D01_S47_001	Single-cell	182.673	337.211	54.1706	39.2265	33.1132	Yes
18001	18001p4E01_S59_001	Single-cell	149.565	277.441	53.9076	42.5377	37.1391	Yes
